# Supplementary material for: Health and Welfare Survey of 30 Dairy Goat Farms in the Midwestern United States
Source: MDPI journal article supplement (doi:10.3390/ani11072007), 2021-07-05
Supplement: s1 [file s1]

Farm ID

## Farm Owner

- 1 Why do you own a dairy goat farm?

- ☐ Continuing operation started by family member(s)
- ☐ I enjoy working with dairy goats
- ☐ Goats are smaller and easier to handle than cows
- ☐ My farm is small (i.e. space limitations)
- ☐ Good market for goat milk
- ☐ Other

Other - specify:

- 2 How do you feel about the following statement: The wellbeing of my goats is a key priority for how I run my farm.

Strongly disagree      Neither agree nor disagree      Strongly agree

(Place a mark on the scale above)

**3. How important to you are each of the following wellbeing principles? Use a tick or cross to mark your answer.**

|                             | Not at all important  | Slightly important    | Important             | Fairly important      | Very important        |
|-----------------------------|-----------------------|-----------------------|-----------------------|-----------------------|-----------------------|
| Good feeding                | <input type="radio"/> |
| Good housing                | <input type="radio"/> |
| Good health                 | <input type="radio"/> |
| Appropriate animal behavior | <input type="radio"/> |

- 4 How many years have you farmed dairy goats?

- 5 Do you have experience on a dairy cow farm?

☐ Yes   ☐ No  
(If yes, proceed to Question 6. If no, proceed to Question 7.)

- 6 How many years of experience?

- 7 Is your farm certified organic?

☐ Yes    ☐ No

- 8 How often do you spend time with your goats (not including milking or routine procedures)?

- ☐ I do not spend time with my goats except for routine procedures, milking etc.
- ☐ Daily
- ☐ Weekly
- ☐ Monthly
- ☐ Other

---

Other - specify:

---

- 
- 9 Approximately how much time do you spend regularly watching your goats?
- 

- 
- 10 Do you name your goats?

☐ Yes  
☐ No

- 
- 11 What data on your animals do you collect?

- ☐ I do not collect data  
☐ Body weight  
☐ Milk production  
☐ Kid birth records (e.g., DOB)  
☐ Death/mortality rates  
☐ Sire/dam records  
☐ Health  
☐ Disease  
☐ Genetic traits (e.g., without horn buds or polled)  
☐ Other

---

Other - specify:

---

- 
- 12 Where do you go for information about operating a dairy goat farm?

- ☐ I do not seek information  
☐ Veterinarian  
☐ Other farmers  
☐ Neighbors  
☐ County extension service  
☐ Dairy cooperative  
☐ Family and friends  
☐ Websites  
☐ Social media  
☐ State or national associations  
☐ Online videos  
☐ Magazines/newsletters  
☐ Conventions/meetings  
☐ Other

---

Other - specify:

---

---

**Staff (including paid or unpaid workers, family members)**

---

- 13 How many staff (0-100) work on your farm (excluding you)?
- 

- 
- 14 Are all of your staff responsible for handling the goats?

☐ Yes ☐ No  
(If yes, proceed to Question 16. If no, proceed to Question 15.)

- 
- 15 How many of your staff handle the goats on a daily basis?
-

- 
- 16 Is there a Code of Conduct for your farm? ☐ Yes ☐ No  
(If yes, proceed to Question 17. If no, proceed to Question 18.)
- 
- 17 Are your staff required to sign a contract confirming their compliance with the Code of Conduct? ☐ Yes ☐ No
- 
- 18 How important to you is staff training?
- Not at all important Important Very important
- =====
- (Place a mark on the scale above)
- 
- 19 What type of training does your staff receive?
- ☐ My staff do not receive training
  - ☐ Animal handling
  - ☐ Goat behavior
  - ☐ Kid rearing practices
  - ☐ Identifying sick/injured animals
  - ☐ Feeding/nutrition
  - ☐ Routine husbandry procedures (e.g., ear tagging, tattooing, disbudding, castration)
  - ☐ Machinery/equipment operation
  - ☐ Milking routines
  - ☐ Housing
  - ☐ Transportation of goats
  - ☐ Record keeping
  - ☐ Other
- 
- Other - specify:
- \_\_\_\_\_
- 
- 20 What factors affect your decision not to provide training for your staff?
- ☐ Training takes too much time
  - ☐ Staff do not attend or engage
  - ☐ It makes no difference for the staff or the animals
  - ☐ I do not know what training is required
  - ☐ I do not know where to go for training advice
  - ☐ Other
- 
- Other - specify:
- \_\_\_\_\_
- 
- 21 Are documents signed by the employee(s) to confirm that training has been completed? ☐ Yes ☐ No
- 
- 22 What type of training would benefit your staff?
- ☐ My staff would not benefit from training
  - ☐ Animal handling
  - ☐ Goat behavior
  - ☐ Kid rearing practices
  - ☐ Identifying sick/injured animals
  - ☐ Feeding/nutrition
  - ☐ Routine husbandry procedures (e.g., ear tagging, tattooing, disbudding, castration)
  - ☐ Machinery/equipment operation
  - ☐ Milking routines
  - ☐ Housing
  - ☐ Transportation of goats
  - ☐ Record keeping
  - ☐ Other

---

Other - specify:

---

- 
- 23 How would you prefer to receive training materials?
- ☐ Hard copy handout
  - ☐ PDF on a device
  - ☐ Via email
  - ☐ Internet/website
  - ☐ Magazine/newsletter
  - ☐ Newspaper
  - ☐ In-person training course
  - ☐ Online training course
  - ☐ At a group meeting/convention
  - ☐ Other
- 

Other - specify:

---

### Goats and Housing

- 24 How many does (adult females) are there in total on your farm?
- 
- 25 What breeds are being milked on your farm? If cross-bred goats, list the dominant breed(s).
- ☐ Saanen
  - ☐ Toggenburg
  - ☐ LaMancha
  - ☐ Alpine
  - ☐ Nubian
  - ☐ Nigerian Dwarf
  - ☐ Oberhasli
  - ☐ Other
- 

Other - specify:

---

- 
- 26 How many does are lactating?
- 

- 
- 27 How many does are non-lactating (dry)?
- 

- 
- 28 How many does will be (or have been) retired this year?
- 

- 
- 29 How many doe kids will you keep (or have been kept) this year to replace your retired does?
- 

- 
- 30 Do you have any goats used for purposes other than for milking (e.g., bucks, show goats)?
- ☐ Yes ☐ No  
(If yes, proceed to Question 31. If no, proceed to Question 32.)

---

31 For what other purposes are your goats used?

- ☐ Bucks for breeding
- ☐ Show
- ☐ Meat
- ☐ Weed control
- ☐ Pets
- ☐ Other

---

Other - specify:

---

---

32 Since January 1 2019, how many adult goats have died of natural causes?

---

---

33 Since January 1 2019, how many adult goats have been euthanized?

---

---

34 How do you group the goats into pens?

- ☐ Randomly grouped
- ☐ Age
- ☐ Weight/size
- ☐ Stage of lactation
- ☐ Stage of pregnancy
- ☐ Other

---

Other - specify:

---

---

35 How often are the goats regrouped with goats from other pens?

- ☐ They are not regrouped (they stay in the same group)
- ☐ They are regrouped after each milking
- ☐ They may mix accidentally
- ☐ Other

---

Other - specify:

---

---

36 How often is fresh bedding added to the pens?

---

---

37 How often is the bedding in the pens cleaned out and replaced?

---

**Goat Behavior**

- 38 How often do you think about the behavior of your goats?
- Never Sometimes Always
- =====
- (Place a mark on the scale above)
- 
- 39 Please list all of the goat behaviors that you observe on a regular basis on your farm?
- ☐ I do not know
  - ☐ Lying/standing in contact with other goats
  - ☐ Feeding at the same time as other goats
  - ☐ Drinking at the same time as other goats
  - ☐ Running
  - ☐ Walking
  - ☐ Trying to escape the pens
  - ☐ Kneeling for long periods
  - ☐ Minimal vocalizing
  - ☐ Vocalizing
  - ☐ Rubbing their heads along the walls of the pen
  - ☐ Standing facing pen walls for long periods
  - ☐ Star gazing (looking skyward) for long periods
  - ☐ Hair pulling of other goats
  - ☐ Biting other goats
  - ☐ Head butting
  - ☐ Fighting
  - ☐ Sneezing
  - ☐ Other
- 
- Other - specify:
- \_\_\_\_\_
- 
- 40 What allowances have you made on your farm for goats to perform natural behaviors?
- ☐ Hay racks
  - ☐ Feed bunks
  - ☐ Elevated food sources
  - ☐ Shelter
  - ☐ Places to hide
  - ☐ Constant groups (i.e. no regrouping)
  - ☐ Access to outdoor spaces
  - ☐ Access to pasture/paddocks
  - ☐ Enrichment (e.g., raised platforms, brushes)
  - ☐ Adequate space per goat
  - ☐ Other
- 
- Other - specify:
- \_\_\_\_\_
- 
- 41 What do you think your goats are motivated to do (e.g., play, sleep, eat, move to parlor)?
- \_\_\_\_\_

**Outdoor Access**

42 Do your goats have outdoor access (not including pasture access)? ☐ Yes ☐ No  
(If yes, proceed to Question 43. If no, proceed to Question 45.)

43 What type of surface(s) is available in the outdoor space?

☐ Earthen  
☐ Concrete  
☐ Gravel  
☐ Wire mesh/metal  
☐ Wooden slats  
☐ Rubber matting  
☐ Other

Other - specify:

\_\_\_\_\_

44 Approximately how much time are they allowed in the outdoor space?

\_\_\_\_\_

**Feeding and Nutrition**

45 Do your goats have access to pasture? ☐ Yes ☐ No  
(If yes, proceed to Question 46. If no, proceed to Question 49.)

46 Approximately how much time do your goats spend on pasture?

\_\_\_\_\_

47 Do your goats receive additional feed? ☐ Yes ☐ No  
(If yes, proceed to Question 48. If no, proceed to Question 53.)

48 Where are the goats fed?

☐ Indoors  
☐ Outdoors

49 What are the goats fed?

☐ Fresh cut grass  
☐ Total mixed ration (both hay and silage)  
☐ Silage  
☐ Hay  
☐ Grain/concentrate  
☐ Other

Other - specify:

\_\_\_\_\_

50 Do the goats have a constant supply of feed (i.e. ad libitum feeding)? ☐ Yes ☐ No

51 How often do you feed your goats?

☐ Once daily  
☐ Twice daily  
☐ Three times daily  
☐ Other

Other - specify:

---

52 What time(s) of the day is feed distributed?

---

### Milking

53 How are the does milked?

- ☐ By hand  
☐ By machine  
 (If by machine, proceed to Question 54. If by hand, proceed to Question 57. )

54 Are the teat cups disinfected after milking?

- ☐ Yes ☐ No  
 (If yes, proceed to Question 55. If no, proceed to Question 57.)

55 How often are the teat cups disinfected?

---

56 How are the teat cups disinfected?

---

### 57. What is the milking frequency per day? Use a tick or cross to mark your answer.

|                 | Once daily            | Twice daily           | Three times daily     | Four or more times daily |
|-----------------|-----------------------|-----------------------|-----------------------|--------------------------|
| Early lactation | <input type="radio"/> | <input type="radio"/> | <input type="radio"/> | <input type="radio"/>    |
| Mid lactation   | <input type="radio"/> | <input type="radio"/> | <input type="radio"/> | <input type="radio"/>    |
| Late lactation  | <input type="radio"/> | <input type="radio"/> | <input type="radio"/> | <input type="radio"/>    |

58 What time(s) of the day are the goats milked?

---

59 Approximately how old is the milking parlor (or area where does are milked)?

---

60 What routine practices are carried out prior to milking?

- ☐ None  
☐ Fore-milk checked  
☐ Teats cleaned of debris/dirt  
☐ Teats disinfected/sanitized  
☐ Gloves are worn by staff  
☐ Other

Other - specify:

---



- 61 What routine practices are carried out after milking?
- ☐ None  
☐ Teat dip/spray  
☐ Teat conditioner  
☐ Other

Other - specify:

---

- 62 Do you check for mastitis?
- ☐ Yes ☐ No  
(If yes, proceed to Question 63. If no, proceed to Question 64.)

- 63 What signs of mastitis do you look for?
- ☐ Swelling  
☐ Color  
☐ Heat  
☐ Firmness to the touch  
☐ Milk quality  
☐ Other

Other - specify:

---

- 64 What is the average lactation length on your farm (in days)?
- 

- 65 What is the average milk production per doe per day?
- 

### Kid Rearing

- 66 How are the kids reared?
- ☐ Dam-reared  
☐ Hand-reared  
☐ Other  
(If dam-reared, proceed to Question 67. If hand-reared, proceed to Question 68.)

Other - specify:

---

- 67 How long are the kids dam-reared?
- ☐ 12 hours or less  
☐ 13-24 hours  
☐ 25-48 hours  
☐ 49 hours or more

- 68 When are the kids removed from the dam?
- ☐ Immediately  
☐ Within 4 hours after birth  
☐ Between 5-12 hours after birth  
☐ Between 25-48 hours after birth  
☐ 49 hours or more after birth

- 69 Approximately how much colostrum (in ounces) is fed within the first 24 hours of life?
-

70 What type of colostrum do the kids receive?

- ☐ Heat-treated cow colostrum
- ☐ Raw cow colostrum
- ☐ Heat-treated goat colostrum
- ☐ Raw goat colostrum
- ☐ Powdered cow colostrum
- ☐ Powdered goat colostrum
- ☐ Other

Other - specify:

---

71 Is the navel/umbilical cord disinfected shortly after birth?

☐ Yes ☐ No

72 How is the kid barn (or area where the kids are reared) kept warm?

- ☐ There is no heating
- ☐ Heating
- ☐ Insulated walls
- ☐ Heat lamps
- ☐ High pen walls to prevent drafts
- ☐ Walls on all 4 sides of the room
- ☐ Clean bedding
- ☐ Dry bedding
- ☐ Other

Other - specify:

---

73 Since January 1 2019, how many goat kids have died of natural causes?

---

74 Since January 1 2019, how many goat kids have been euthanized?

---

75 What factors affect when the kids are weaned?

- ☐ Age
- ☐ Weight/size
- ☐ Milk availability/cost
- ☐ Solid feed availability/cost
- ☐ Other

Other - specify:

---

76 Approximately how old are your kids at weaning?

---

77 What is the average kid weight (in pounds) at weaning?

---

- 78 What process is used to wean the kids?
- ☐ Reducing the quantity of milk over time
  - ☐ Diluting the milk
  - ☐ Replacing milk with solid feed
  - ☐ Other

Other - specify:

---

### Disbudding

- 79 Are your kids disbudded?
- ☐ Yes ☐ No  
(If yes, proceed to Question 80. If no, proceed to Question 94.)

- 80 Who generally performs the disbudding?
- ☐ Myself
  - ☐ Staff
  - ☐ Friends/family
  - ☐ Paid contractor(s)
  - ☐ Veterinarian
  - ☐ Other

Other - specify:

---

- 81 From whom did you learn how to disbud goat kids?
- ☐ No-one, I taught myself
  - ☐ Staff
  - ☐ Friends/family
  - ☐ Paid contractor(s)
  - ☐ Veterinarian
  - ☐ Other

Other - specify:

---

- 82 Approximately how old are the kids when they are disbudded?
- 

- 83 What disbudding method(s) is used?
- ☐ Cautery iron - Proceed to Question 84
  - ☐ Caustic paste - Proceed to Question 87
  - ☐ Liquid nitrogen
  - ☐ Other

Other - specify:

---

- 84 How is the iron powered?
- ☐ Electric
  - ☐ Liquefied petroleum gas (LPG)
  - ☐ Gas canister (butane)
  - ☐ Other

Other - specify:

---

- 85 Approximately how long is the iron held on each horn bud (total)?  
☐ 1-4 seconds  
☐ 5-7 seconds  
☐ 8-12 seconds  
☐ 13 or more seconds
- 
- 86 Is the horn bud removed? ☐ Yes ☐ No
- 
- 87 What is done to prevent the spread of the paste?  
☐ Nothing  
☐ The kids are isolated from each other  
☐ The kids are kept indoors  
☐ Vaseline is spread around the outside of the paste  
☐ Other
- 
- Other - specify:  
 \_\_\_\_\_
- 
- 88 Is antiseptic applied to the disbudding wounds? ☐ Yes ☐ No
- 
- 89 How do the kids usually behave during disbudding?  
 \_\_\_\_\_
- 
- 90 How do the kids usually behave following disbudding?  
 \_\_\_\_\_
- 
- 91 How confident are you in your own practice to disbud kids effectively without complication?  
 Not at all confident                      Confident                      Very confident  
 \_\_\_\_\_  
 (Place a mark on the scale above)
- 
- 92 How confident are you in the operator's practice to disbud kids effectively without complication?  
 Not at all confident                      Confident                      Very confident  
 \_\_\_\_\_  
 (Place a mark on the scale above)
- 
- 93 How likely are you to change your practice if there was a better method available?  
 Not at all likely                      Likely                      Very likely  
 \_\_\_\_\_  
 (Place a mark on the scale above)
- 
- 94 How much pain do you think disbudding causes?  
 None                      Some pain                      Extreme pain  
 \_\_\_\_\_  
 (Place a mark on the scale above)

### Castration

- 95 Are your buck kids generally castrated? ☐ Yes ☐ No  
 (If yes, proceed to Question 96. If no, proceed to Question 106.)
- 
- 96 Why are your buck kids castrated?  
☐ Used for showing  
☐ Used for meat  
☐ Kept as pets  
☐ Other

---

☐ Myself  
☐ Staff  
☐ Friends/family  
☐ Paid contractor(s)  
☐ Veterinarian  
☐ Other

---

☐ No-one, I taught myself

☐ Staff

☐ Friends/family

☐ Paid contractor(s)

☐ Veterinarian

☐ Other

☐ Rubber ring/band  
☐ Surgical  
☐ Burdizzo  
☐ Other

Not at all confident                      Confident                      Very confident

\_\_\_\_\_

(Place a mark on the scale above)

Not at all confident                      Confident                      Very confident

\_\_\_\_\_

*(Place a mark on the scale above)*

105 How likely are you to change your castration practice if there was a better method available?

Not at all likely

Likely

Very likely

\_\_\_\_\_

(Place a mark on the scale above)

106 How much pain do you think castration causes?

None

Some pain

Extreme pain

\_\_\_\_\_

(Place a mark on the scale above)

### Hoof Trimming

107 Are the goat's hooves trimmed?

☐ Yes ☐ No

(If yes, proceed to Question 108. If no, proceed to Question 117.)

108 Who generally performs the hoof trimming?

- ☐ Myself
- ☐ Staff
- ☐ Friends/family
- ☐ Paid contractor(s)
- ☐ Veterinarian
- ☐ Other

Other - specify:

\_\_\_\_\_

109 From whom did you learn how to hoof trim goats?

- ☐ No-one, I taught myself
- ☐ Staff
- ☐ Friends/family
- ☐ Paid contractor(s)
- ☐ Veterinarian
- ☐ Other

Other - specify:

\_\_\_\_\_

110 What method is used to trim the goat's hooves?

- ☐ Grinder
- ☐ Hand-powered trimmer/shears
- ☐ Pneumatic hoof trimmer
- ☐ Blade
- ☐ Other

Other - specify:

\_\_\_\_\_

111 What factors affect when the goat's hooves are trimmed?

- ☐ Length of hooves
- ☐ Age
- ☐ Routinely
- ☐ Once identified as lame
- ☐ Other

Other - specify:

\_\_\_\_\_

112 Approximately how often are the goat's hooves trimmed?

---

113 Approximately how old are the goats at their first hoof trim?

---

114 How confident are you in your own practice to hoof trim goats effectively without complication?

Not at all confident                      Confident                      Very confident

=====

(Place a mark on the scale above)

115 How confident are you in the operator's practice to hoof trim goats effectively without complication?

Not at all confident                      Confident                      Very confident

=====

(Place a mark on the scale above)

116 How likely are you to change your practice if there was a better method available?

Not at all likely                      Likely                      Very likely

=====

(Place a mark on the scale above)

### Euthanasia

117 Are goats/kids euthanized on your farm?

☐ Yes    ☐ No

(If yes, proceed to Question 118. If no, proceed to Question 127.)

118 Why are goats/kids euthanized?

- ☐ Fractures
- ☐ Emergency medical conditions causing severe pain
- ☐ Emaciation/debilitation from disease/injury
- ☐ Paralysis
- ☐ High cost of treatment
- ☐ Diseases with no known cure (e.g., Johne's)/recovery is too long
- ☐ Positive test for caprine arthritis encephalitis
- ☐ Unwanted buck/doe kids
- ☐ Retired/old milking doe
- ☐ Retired/old breeding buck
- ☐ Other

Other - specify:

---

119 Who generally euthanizes the goats/kids?

- ☐ Myself
- ☐ Staff
- ☐ Friends/family
- ☐ Paid contractor(s)
- ☐ Veterinarian
- ☐ Other

Other - specify:

---

☐ No-one, I taught myself

☐ Staff

☐ Friends/family

☐ Paid contractor(s)

☐ Veterinarian

☐ Other

---

☐ Blunt force trauma (e.g., with a hammer)  
☐ Captive bolt device  
☐ Firearm  
☐ Veterinarian administered drug  
☐ Other

---

- ☐ Blunt force trauma (e.g., with a hammer)
- ☐ Captive bolt device
- ☐ Firearm
- ☐ Veterinarian administered drug
- ☐ Other

---

---

Not at all confident                      Confident                      Very confident

\_\_\_\_\_

(Place a mark on the scale above)

Not at all confident                      Confident                      Very confident

\_\_\_\_\_

*(Place a mark on the scale above)*

Not at all likely                      Likely                      Very likely

\_\_\_\_\_

(Place a mark on the scale above)



## Health

☐ Yes    ☐ No

☐ Yes   ☐ No  
(If yes, proceed to Question 129. If no, proceed to Question 133.)

☐ Disbudding  
☐ Castration  
☐ Disease  
☐ Injury  
☐ Other

---

☐ Myself  
☐ Staff  
☐ Friends/family  
☐ Paid contractor(s)  
☐ Veterinarian  
☐ Other

---

☐ Yes    ☐ No

☐ Yes    ☐ No

- ☐ Cost
- ☐ Time taken to administer pain relief
- ☐ Use of a veterinarian
- ☐ Benefits for the animal
- ☐ Benefits for humans (i.e. ease of handling)
- ☐ Other

---

Never Sometimes Always

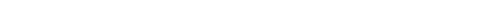

*(Place a mark on the scale above)*

☐ Yes

☐ No

136 For what services do you usually request a veterinarian?

- ☐ Care for sick/injured animals
- ☐ Emergencies
- ☐ Herd health
- ☐ Hoof trimming
- ☐ Disbudding
- ☐ Castration
- ☐ Euthanasia
- ☐ Reproduction
- ☐ Record keeping
- ☐ Nutrition advice
- ☐ Other

Other - specify:

---

137 What factors affect the use of veterinarians?

- ☐ Expense
- ☐ Time
- ☐ Administration of pain relief
- ☐ Good experience with a veterinarian
- ☐ Bad experience with a veterinarian
- ☐ Local veterinary practice
- ☐ Distant veterinary practice
- ☐ The level of goat experience/knowledge
- ☐ Other

Other - specify:

---

138 How often are your goats treated for internal parasites (i.e. dewormed)?

---

139 How often are your goats treated for external parasites (e.g., flies, ticks, lice etc.)?

---

140 Has Caseous Lymphadenitis (CL) been diagnosed on your farm?

- ☐ Yes ☐ No  
(If yes, proceed to Question 141. If no, proceed to Question 143.)

141 Approximately how many cases?

---

142 What do you do for goats testing positive?

---

143 Has Caprine Arthritis Encephalitis (CAE) been diagnosed on your farm?

- ☐ Yes ☐ No  
(If yes, proceed to Question 144. If no, proceed to Question 146.)

144 Approximately how many cases?

---

---

145 What do you do for goats testing positive?

---

---

146 Has Johne's Disease been diagnosed on your farm?

☐ Yes ☐ No

(If yes, proceed to Question 147. If no, proceed to Question 149.)

---

147 Approximately how many cases?

---

---

148 What do you do for goats testing positive?

---

---

149 Do you observe lameness on your farm?

☐ Yes ☐ No

(If yes, proceed to Question 150. If no, proceed to Question 152.)

---

150 Do you regularly treat animals identified as being lame?

☐ Yes ☐ No

---

151 How are lame goats treated?

---

---

152 Is body condition assessed on your farm?

☐ Yes ☐ No

(If yes, proceed to Question 153. If no, proceed to Question 156.)

---

153 How is body condition assessed?

---

---

154 How often is body condition assessed?

- ☐ Daily  
☐ Weekly  
☐ Monthly  
☐ Yearly  
☐ Other

---

Other - specify:

---

---

## General

---

156 Is each animal permanently identified?

☐ Yes ☐ No

(If yes, proceed to Question 157. If no, proceed to Question 158.)

---

157 What method(s) are used?

- ☐ Ear tag  
☐ Collar  
☐ Tattoo  
☐ Other

---

Other - specify:

---

---

158 How important is cleanliness on your farm?

Not at all                      Important                      Very important  
important

=====

(Place a mark on the scale above)

---

159 How often are the goat pens disinfected?

- ☐ The pens are not disinfected regularly
- ☐ Daily
- ☐ Weekly
- ☐ Monthly
- ☐ Other

---

Other - specify:

---

---

160 How often are the walkways leading to and from the milking parlor disinfected?

- ☐ The walkways are not disinfected regularly
- ☐ Daily
- ☐ Weekly
- ☐ Monthly
- ☐ Other

---

Other - specify:

---

---

161 How often is the milking parlor disinfected?

- ☐ The milking parlor is not disinfected regularly
- ☐ Daily
- ☐ Weekly
- ☐ Monthly
- ☐ Other

---

Other - specify:

---

---

162 Are goats evaluated for fitness for travel prior to transport from your farm?

- ☐ Yes
  - ☐ No
- (If yes, proceed to Question 163. If no, proceed to Demographics.)

---

163 What do you look for in a goat that is fit to travel?

---

**Demographics**

To which gender identity do you most identify?

- ☐ Female
- ☐ Male
- ☐ Other
- ☐ Prefer not to say

How old are you?

---
